# Supplementary material
Source: Springer Nature journal article supplement (https://www.springermedizin.de/resource/supplementary/12939_2011_197_MOESM2_ESM.pdf/9550576)

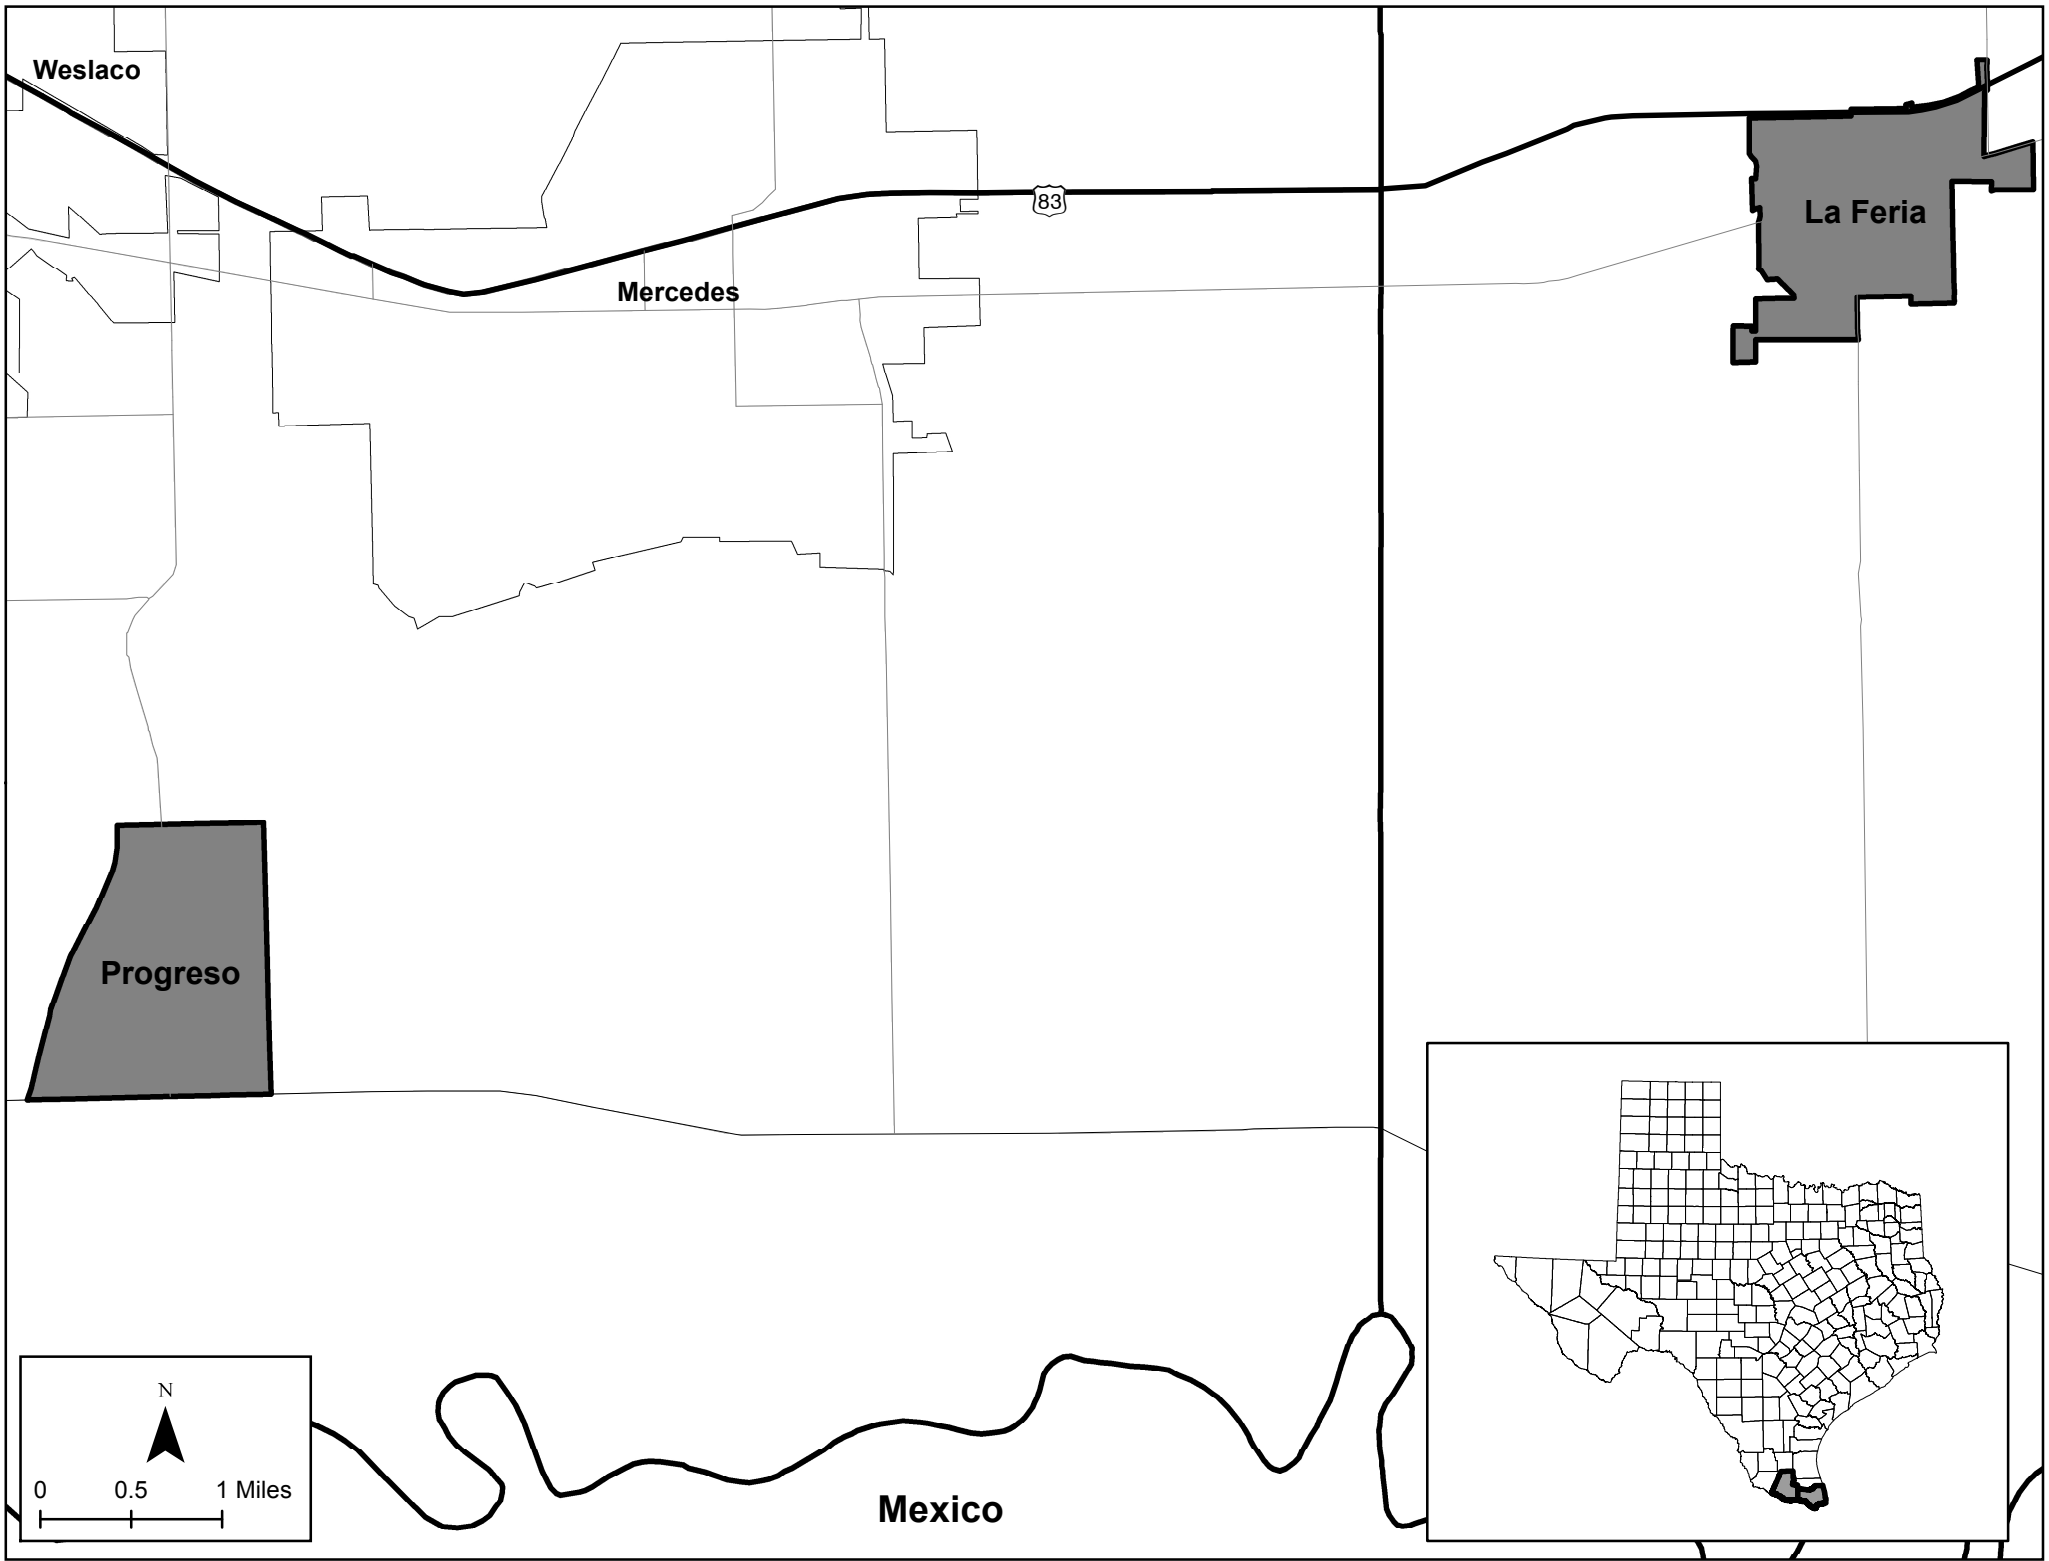

Weslaco

Mercedes

La Feria

83

Progreso

Mexico

N

0 0.5 1 Miles

Supplement: MOESM2 [file 9550576]
